# Supplementary material for: Tailoring the coordination environment of double-atom catalysts to boost electrocatalytic nitrogen reduction: a first-principles study
Source: Royal Society of Chemistry journal article supplement (doi:10.1039/d3nr03310d), 2023-01-01
Supplement: d3nr03310d1.pdf [file d3nr03310d1.pdf]

*Supporting Information for*

**Tailoring the coordination environment of double-atom catalyst to boost electrocatalytic  
nitrogen reduction: a first-principles study**

Jiarui Wu<sup>1</sup>, Donghai Wu<sup>1,2</sup>, Haobo Li<sup>1</sup>, Yanhao Song<sup>1</sup>, Wenjing Lv<sup>1</sup>, Xiaohu Yu<sup>3\*</sup>,

Dongwei Ma<sup>1\*</sup>

<sup>1</sup>*Key Laboratory for Special Functional Materials of Ministry of Education, and School of  
Materials Science and Engineering, Henan University, Kaifeng 475004, China*

<sup>2</sup>*Henan Key Laboratory of Nanocomposites and Applications, Institute of Nanostructured  
Functional Materials, Huanghe Science and Technology College, Zhengzhou 450006, China*

<sup>3</sup>*Institute of Theoretical and Computational Chemistry, Shaanxi Key Laboratory of Catalysis,  
School of Chemical & Environment Sciences, Shaanxi University of  
Technology, Hanzhong 723000, China*

---

\*Corresponding author. E-mail: yuxiaohu@snut.edu.cn (X. Yu).

\*Corresponding author. E-mail: madw@henu.edu.cn; dwmachina@126.com; (D. Ma).

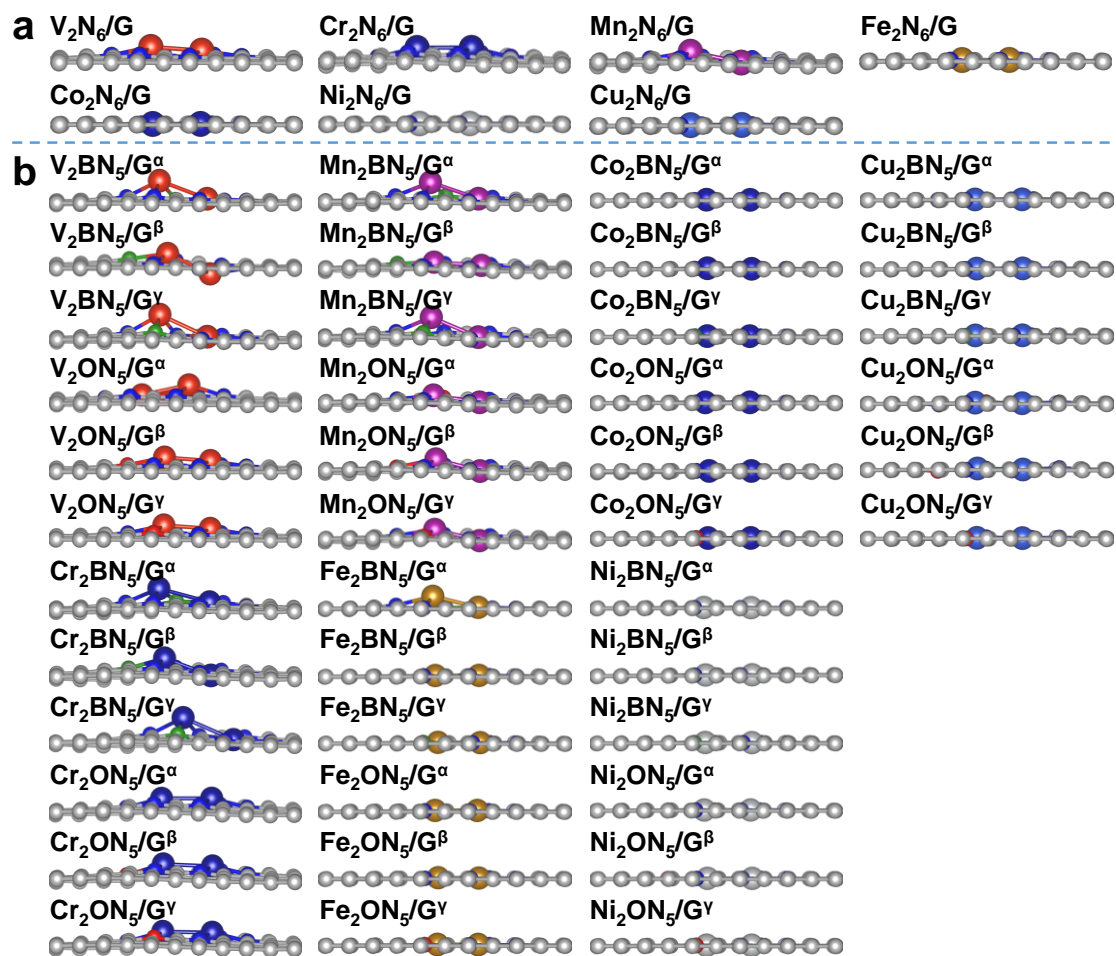

**Fig. S1.** Optimized configurations of the studied  $M_2N_6/G$  (a) and  $M_2B(O)N_5/G$  (b) DACs. The larger colored balls denote TM atoms, and the small silver, blue, red, green balls represent C, N, O, and B atoms, respectively.

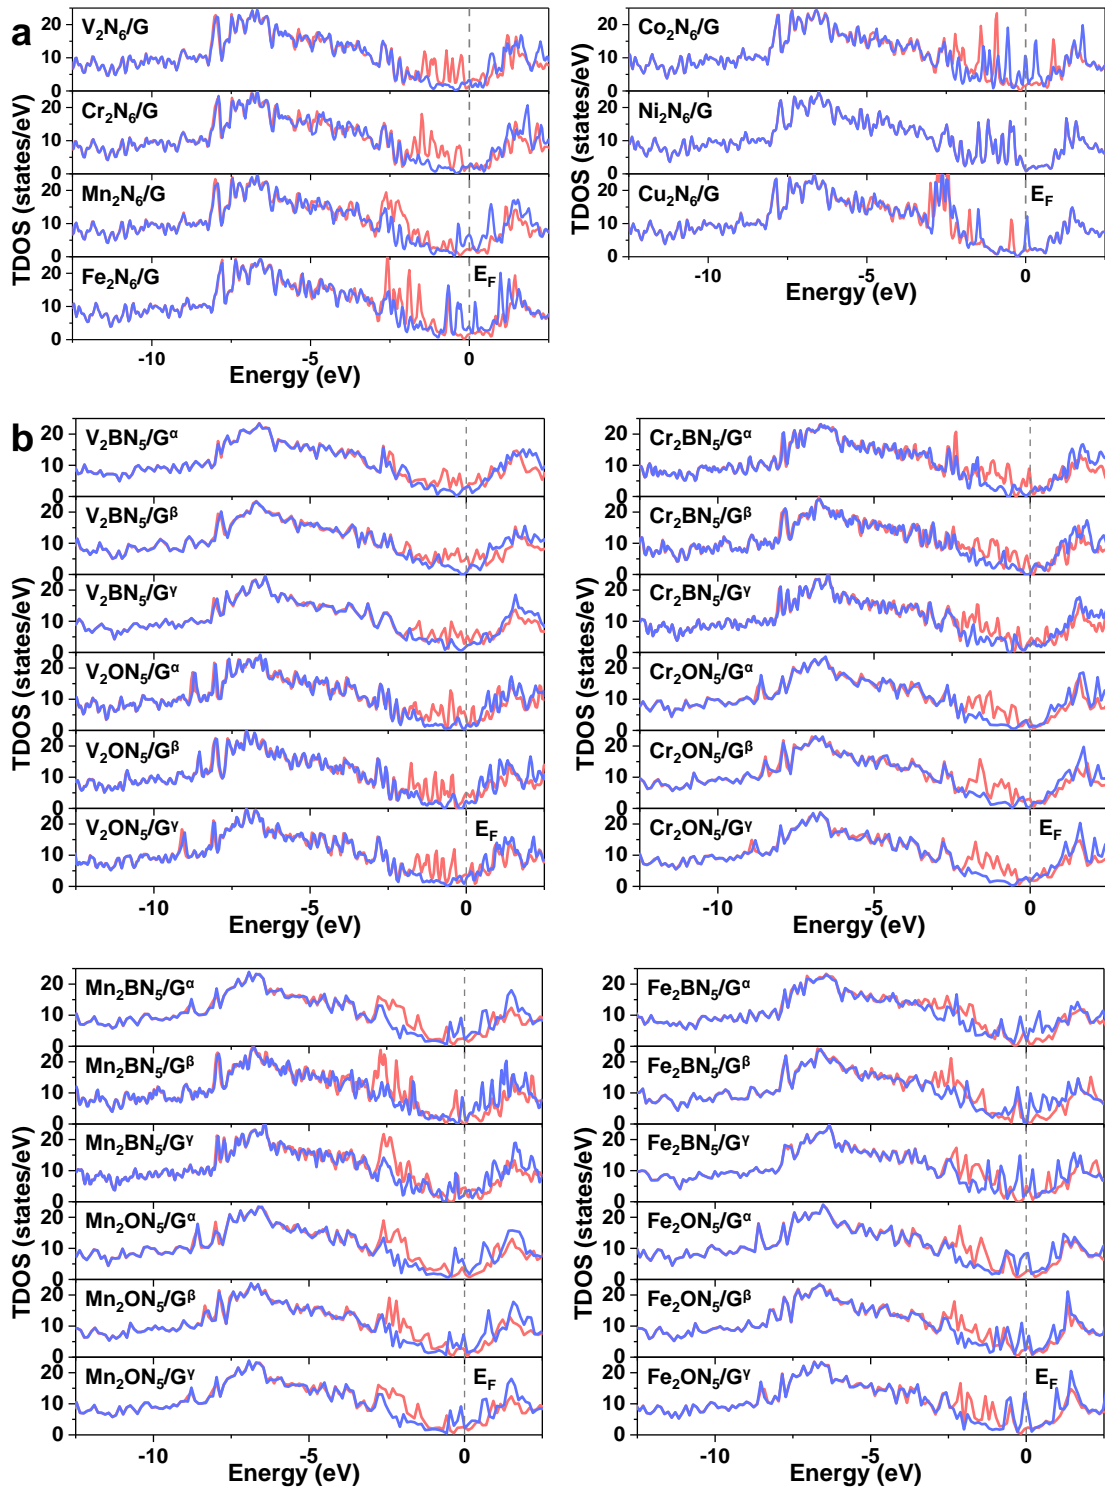

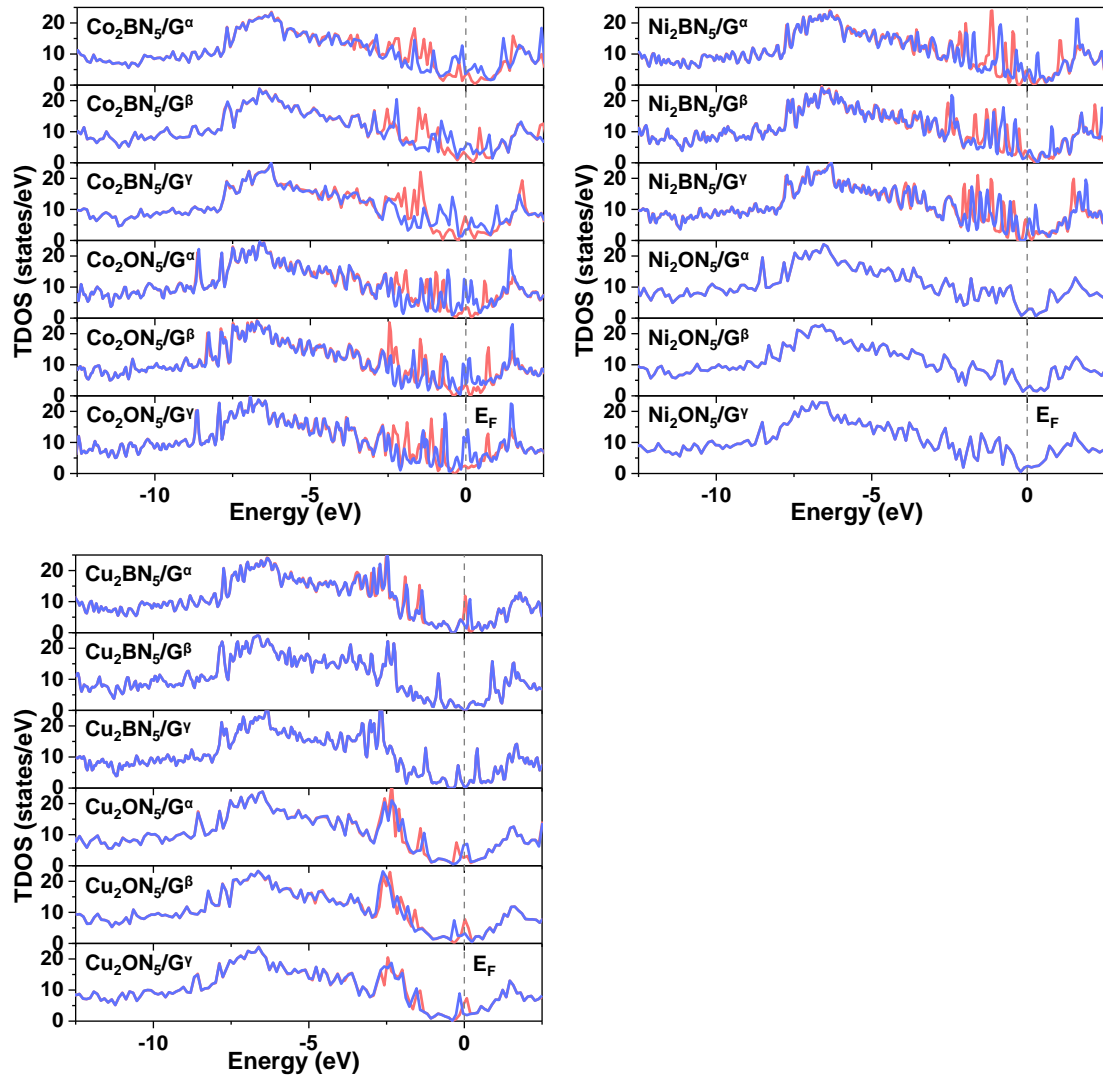

**Fig. S2.** The calculated total density of states (TDOS) of the studied  $M_2N_6/G$  (a) and  $M_2B(O)N_5/G$  (b) DACs. The red and blue lines denote the spin-up and spin-down states, respectively. The vertical dashed lines represent Fermi level ( $E_F$ ), which are set to 0 eV.

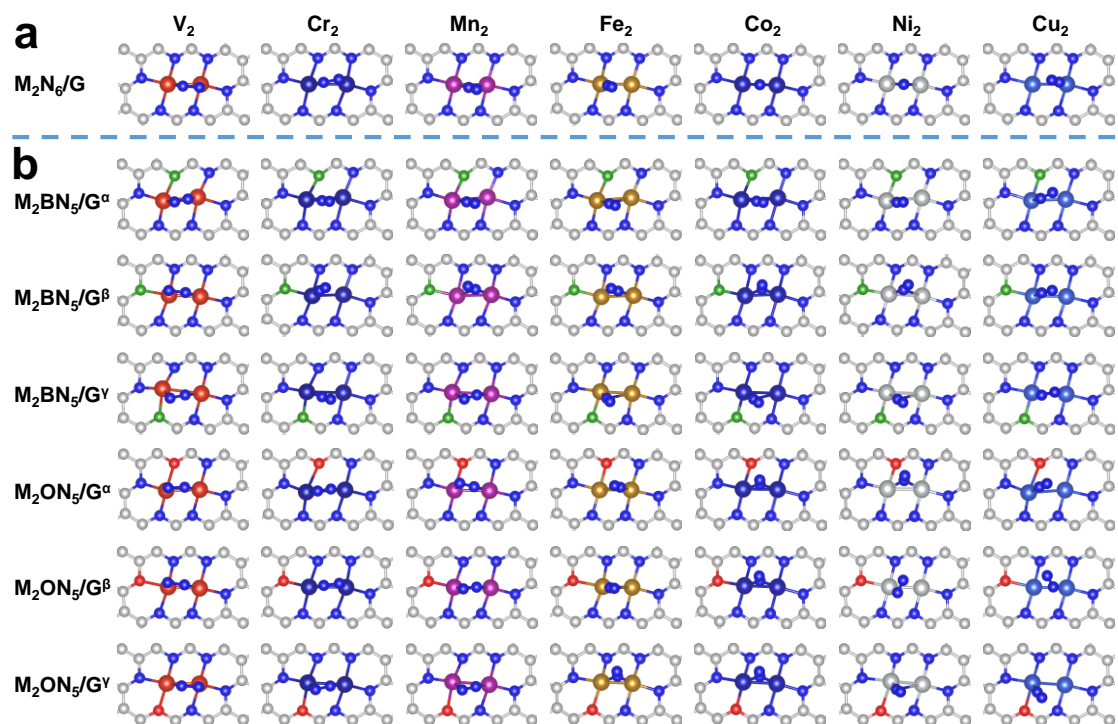

**Fig. S3.** Optimized configurations of the most favorable models for  $*N_2$  adsorption on the studied  $M_2N_6/G$  (a) and  $M_2B(O)N_5/G$  (b) DACs. The larger colored balls denote TM atoms, and the small silver, blue, red, green balls represent C, N, O, and B atoms, respectively.

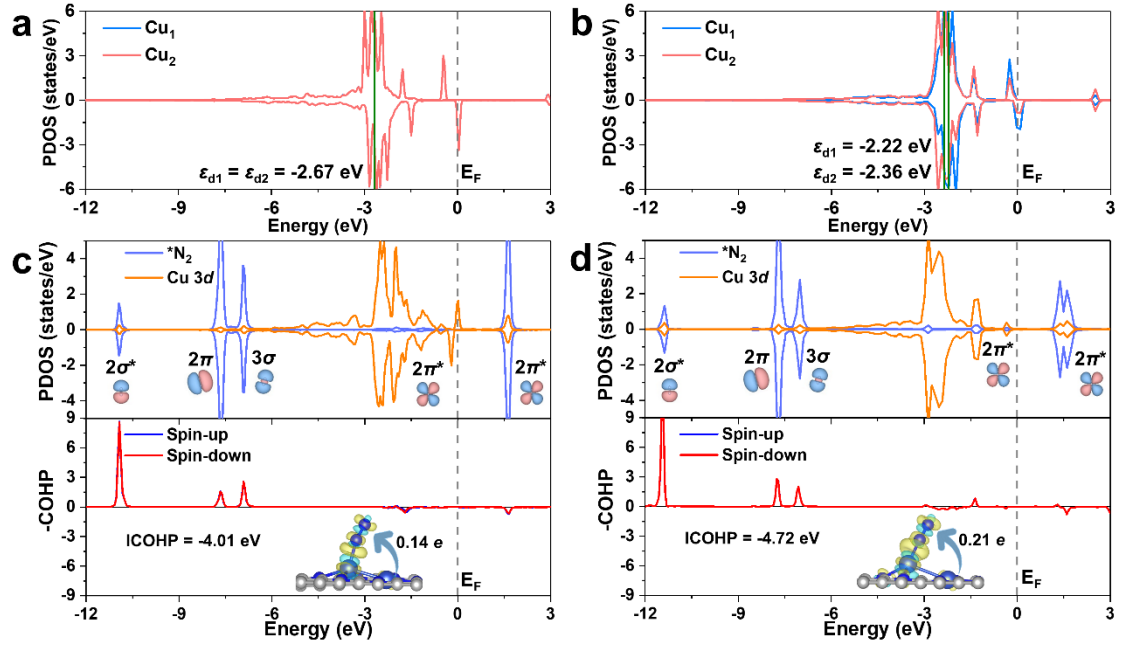

**Fig. S4.** Projected density of states (PDOS) and  $d$ -band center ( $\epsilon_d$ ) of the  $3d$  orbitals of Cu atoms for Cu<sub>2</sub>N<sub>6</sub>/G (a) and Cu<sub>2</sub>ON<sub>5</sub>/G<sup>α</sup> (b). In (b), Cu<sub>1</sub> denotes the Cu atom co-coordinated with O and N atoms, and Cu<sub>2</sub> is another Cu atom. The positive and negative PDOS denote the spin-up and spin-down states, respectively. PDOS for the molecular orbitals of \*N<sub>2</sub> and the  $3d$  orbitals of its bonded Cu atom (top panels) and the corresponding COHP (lower panels) for \*N<sub>2</sub> adsorbed Cu<sub>2</sub>N<sub>6</sub>/G (c) and Cu<sub>2</sub>ON<sub>5</sub>/G<sup>α</sup> (d). Insets in the lower panels are the charge density difference (CDD) plots, where the yellow and cyan regions denote electron accumulation and depletion, respectively, with an isosurface of 0.002 e/bohr<sup>3</sup>. The vertical green and grey lines represent  $\epsilon_d$  and E<sub>F</sub>, respectively.

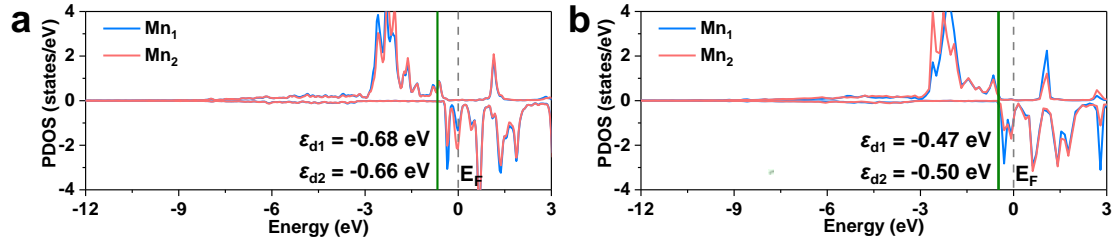

**Fig. S5.** PDOS and  $\epsilon_d$  of  $3d$  orbitals of the Mn atoms for Mn<sub>2</sub>N<sub>6</sub>/G (a) and Mn<sub>2</sub>ON<sub>5</sub>/G<sup>a</sup> (b). In (b), Mn<sub>1</sub> denotes the Mn atom co-coordinated with O and N atoms, and Mn<sub>2</sub> is another Mn atom. The positive and negative PDOS denote the spin-up and spin-down states, respectively. The vertical green and grey lines represent  $\epsilon_d$  and  $E_F$ , respectively.

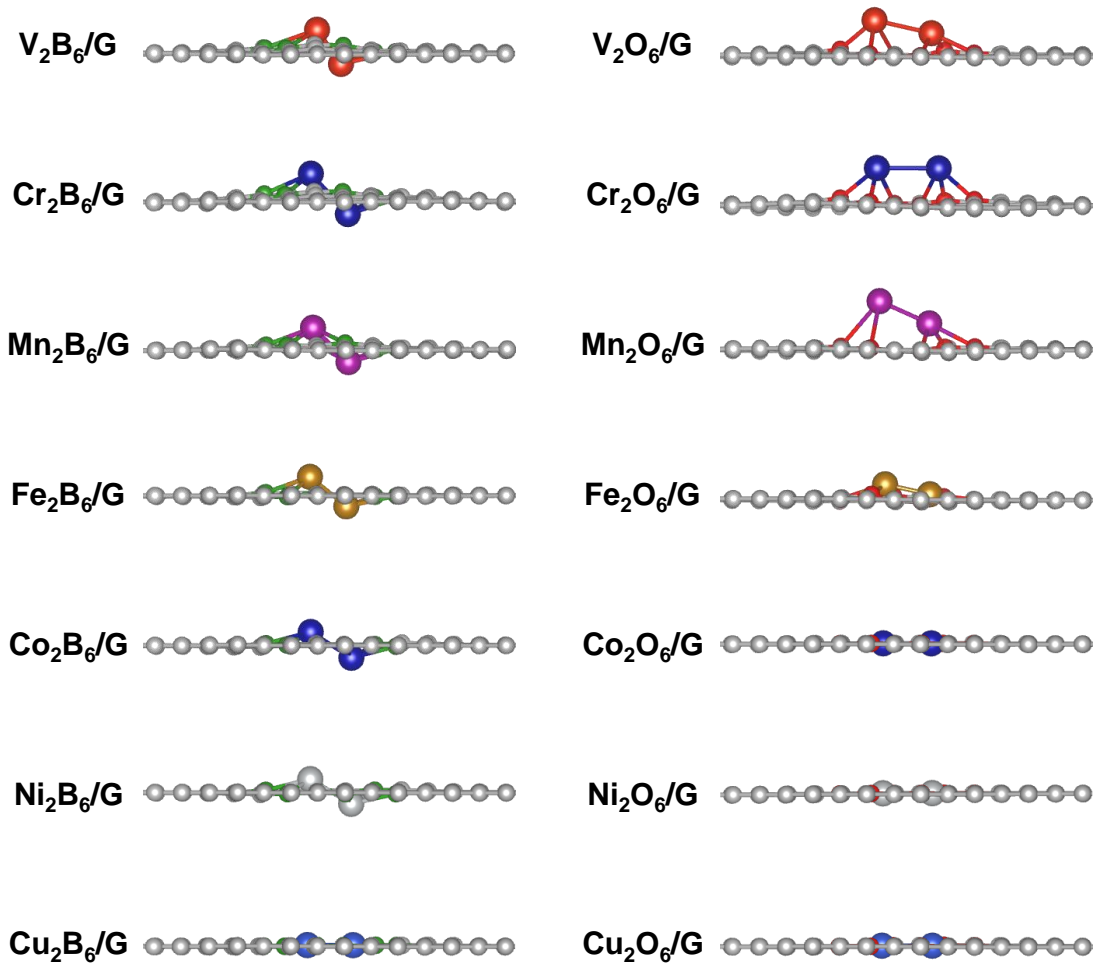

**Fig. S6.** Optimized configurations of the  $M_2B_6/G$  and  $M_2O_6/G$  DACs. The larger colored balls denote TM atoms, and the small silver, red, and green balls represent C, O, and B atoms, respectively.



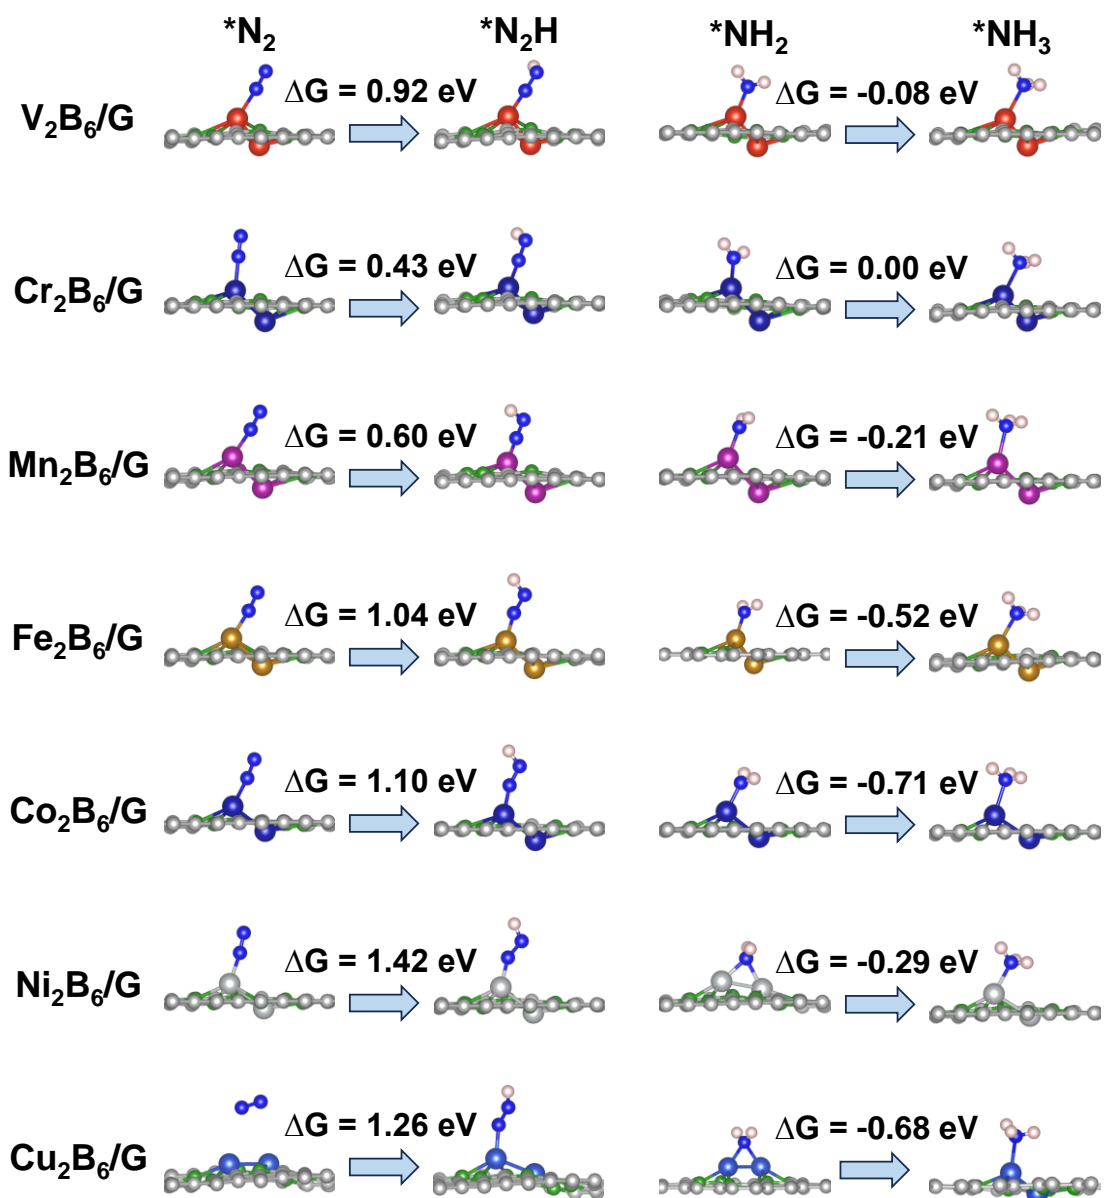

**Fig. S7.** Optimized intermediate configurations and corresponding free energy change ( $\Delta G$ ) for the first hydrogenation step ( $*N_2 + H^+ + e^- \rightarrow *N_2H$ ) and last hydrogenation step ( $*NH_2 + H^+ + e^- \rightarrow *NH_3$ ) during the NRR process on the  $M_2B_6/G$  DACs. The larger colored balls denote TM atoms, and the small silver, blue, green, and pink balls represent C, N, B, and H atoms, respectively.

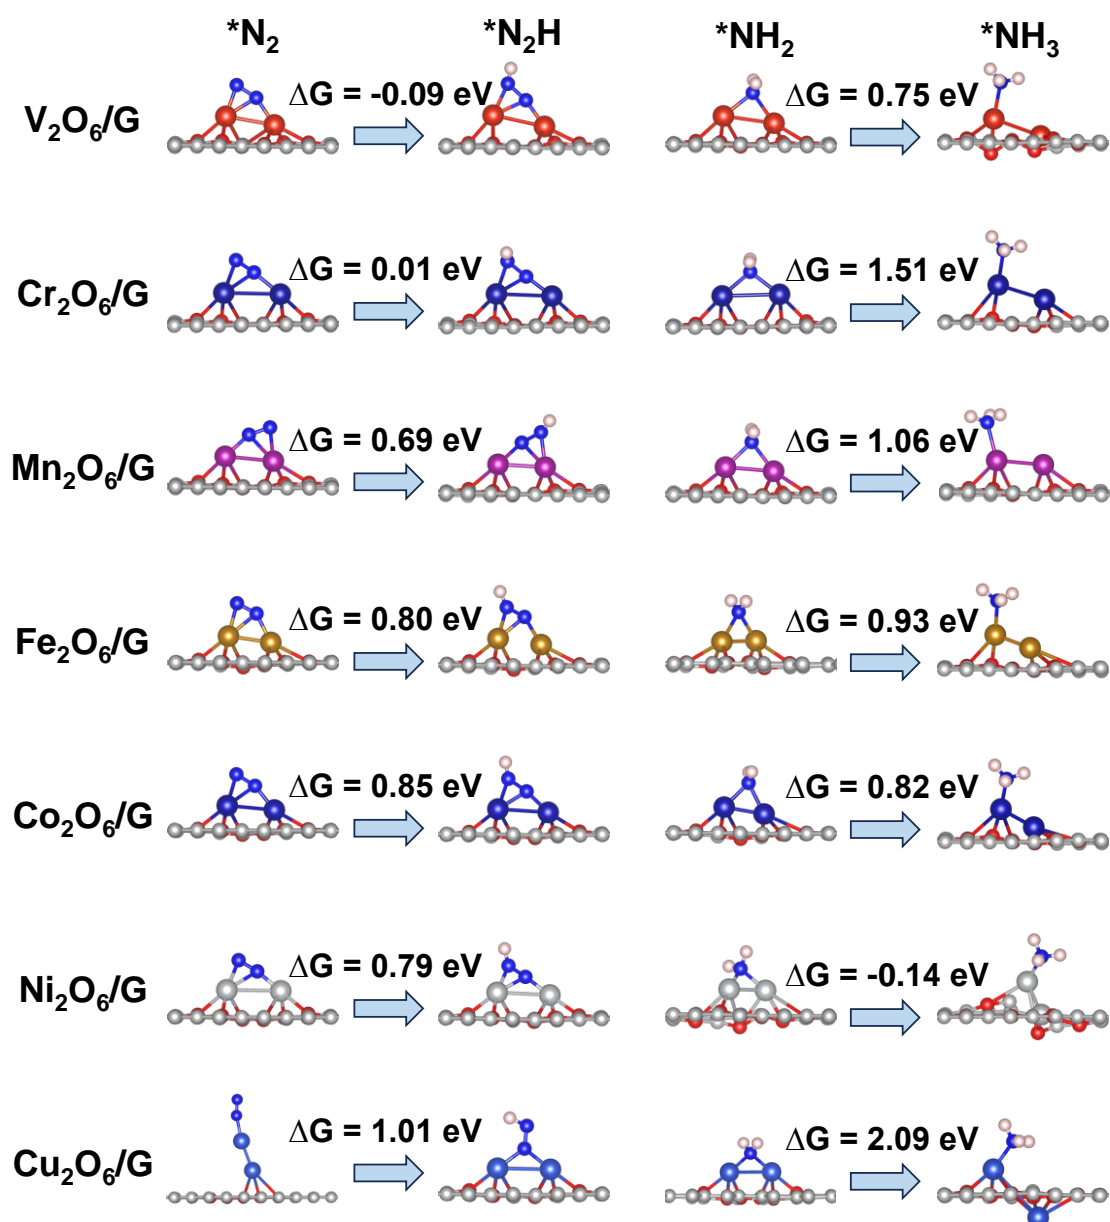

**Fig. S8.** Optimized intermediate configurations and corresponding free energy change ( $\Delta G$ ) for the first hydrogenation step ( $*N_2 + H^+ + e^- \rightarrow *N_2H$ ) and last hydrogenation step ( $*NH_2 + H^+ + e^- \rightarrow *NH_3$ ) during the NRR process on the  $M_2O_6/G$  DACs. The larger colored balls denote TM atoms, and the small silver, blue, red, and pink balls represent C, N, O, and H atoms, respectively.

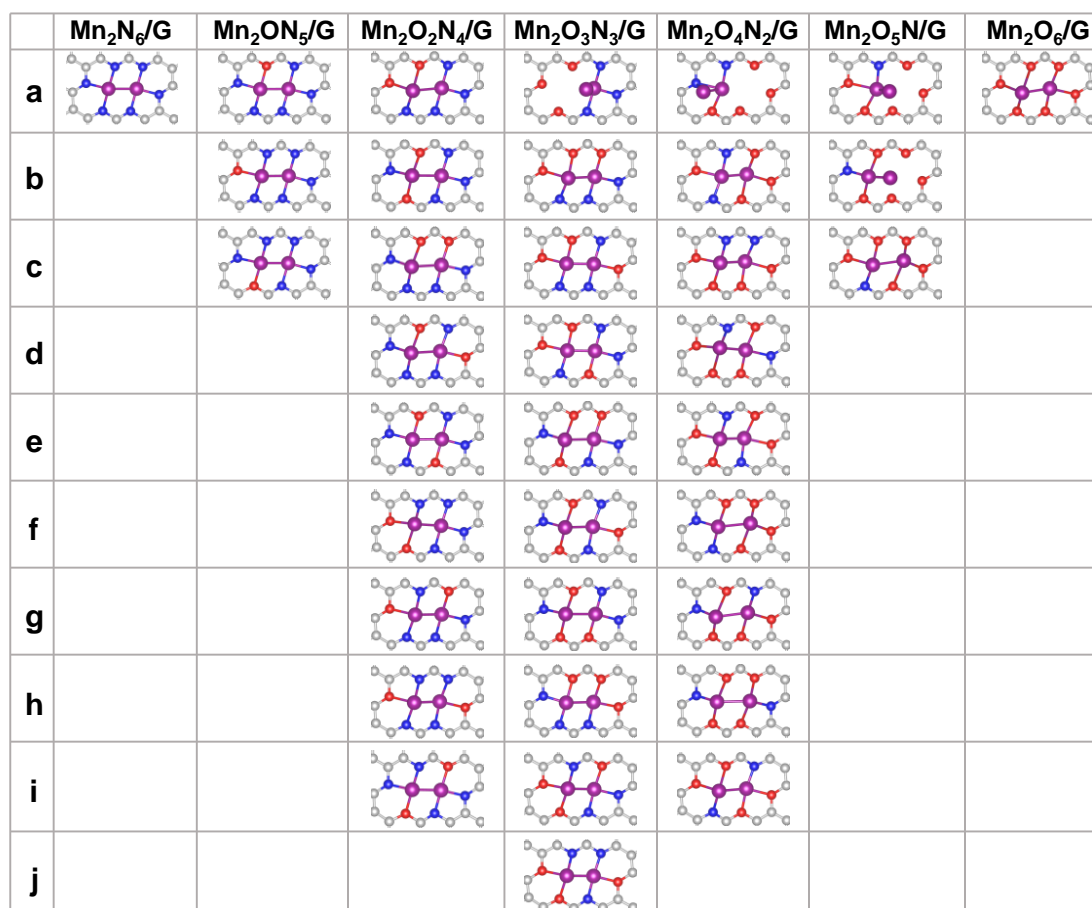

**Fig. S9.** Optimized configurations of the  $\text{Mn}_2\text{O}_x\text{N}_{6-x}/\text{G}$  ( $x=0-6$ ) DACs. The larger colored balls denote TM atoms, and the small silver, blue, and red balls represent C, N, and O atoms, respectively.

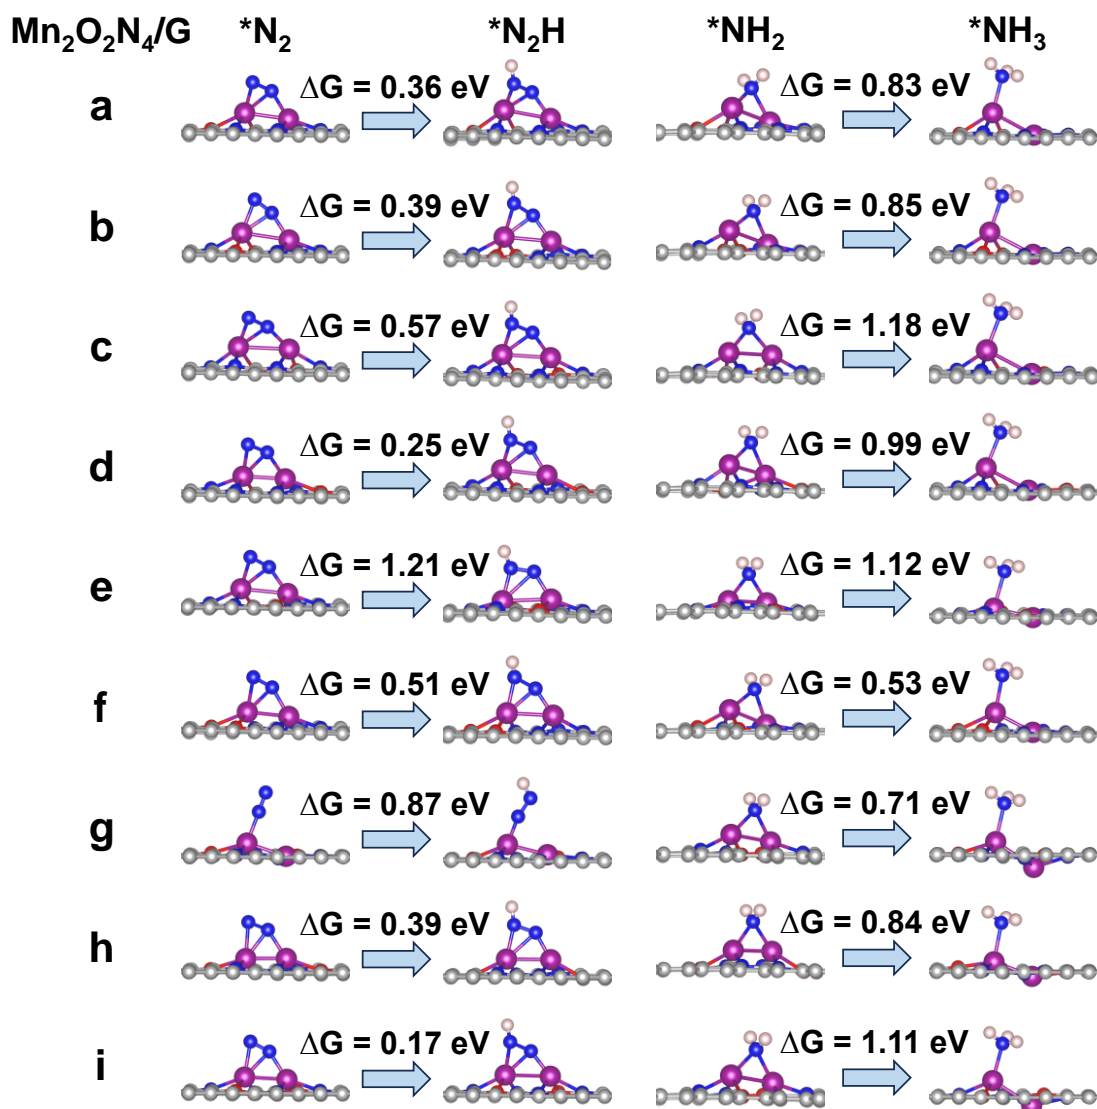

**Fig. S10.** Optimized intermediate configurations and corresponding free energy change ( $\Delta\text{G}$ ) for the first hydrogenation step ( $^*\text{N}_2 + \text{H}^+ + e^- \rightarrow ^*\text{N}_2\text{H}$ ) and last hydrogenation step ( $^*\text{NH}_2 + \text{H}^+ + e^- \rightarrow ^*\text{NH}_3$ ) during the NRR process on the  $\text{Mn}_2\text{O}_2\text{N}_4/\text{G}$  DACs. The larger colored balls denote TM atoms, and the small silver, blue, red, and pink balls represent C, N, O, and H atoms, respectively.

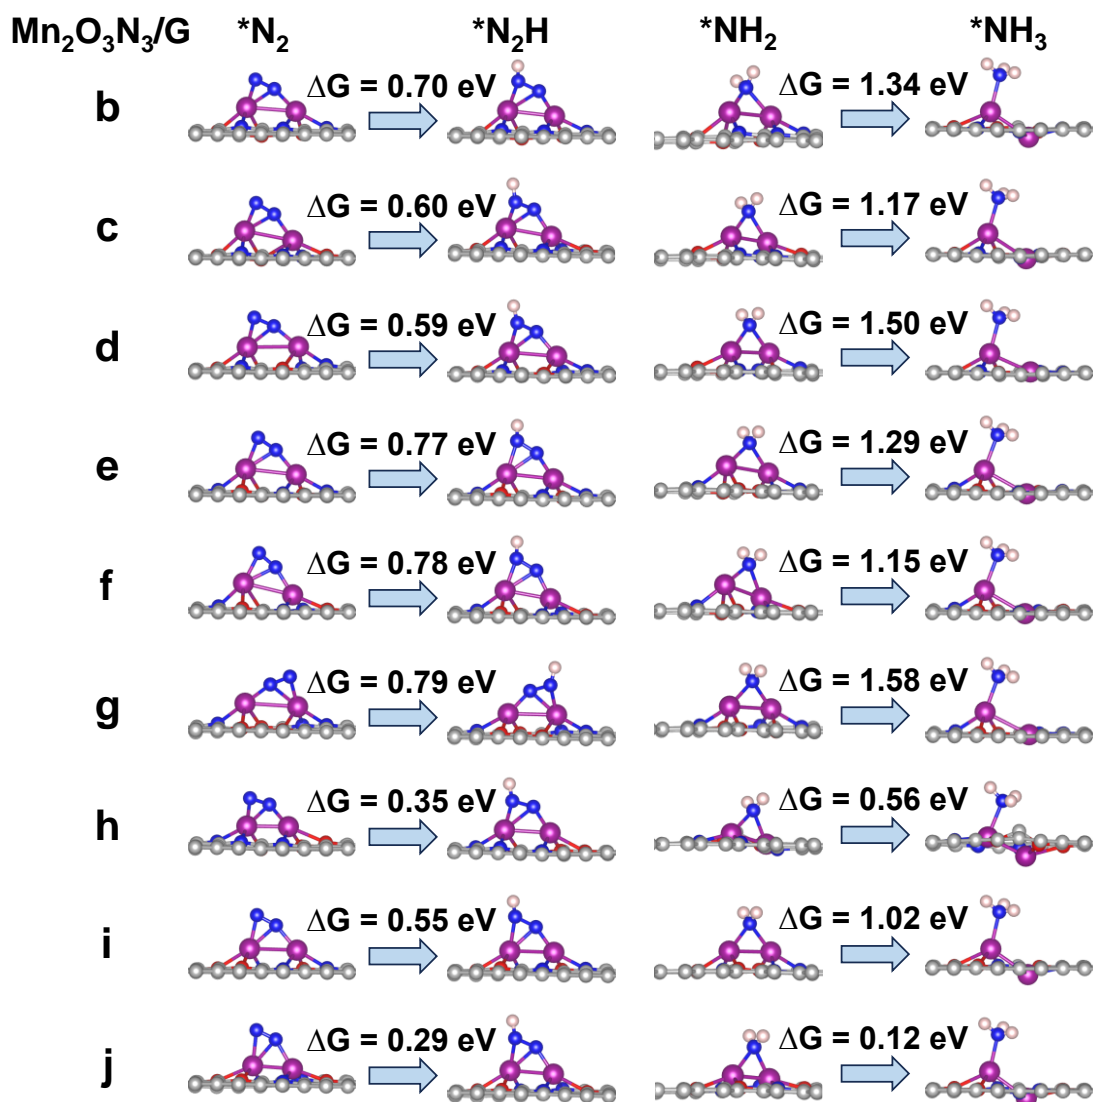

**Fig. S11.** Optimized intermediate configurations and corresponding free energy change ( $\Delta G$ ) for the first hydrogenation step ( $*N_2 + H^+ + e^- \rightarrow *N_2H$ ) and last hydrogenation step ( $*NH_2 + H^+ + e^- \rightarrow *NH_3$ ) during the NRR process on the Mn<sub>2</sub>O<sub>3</sub>N<sub>3</sub>/G DACs. The larger colored balls denote TM atoms, and the small silver, blue, red, and pink balls represent C, N, O, and H atoms, respectively.

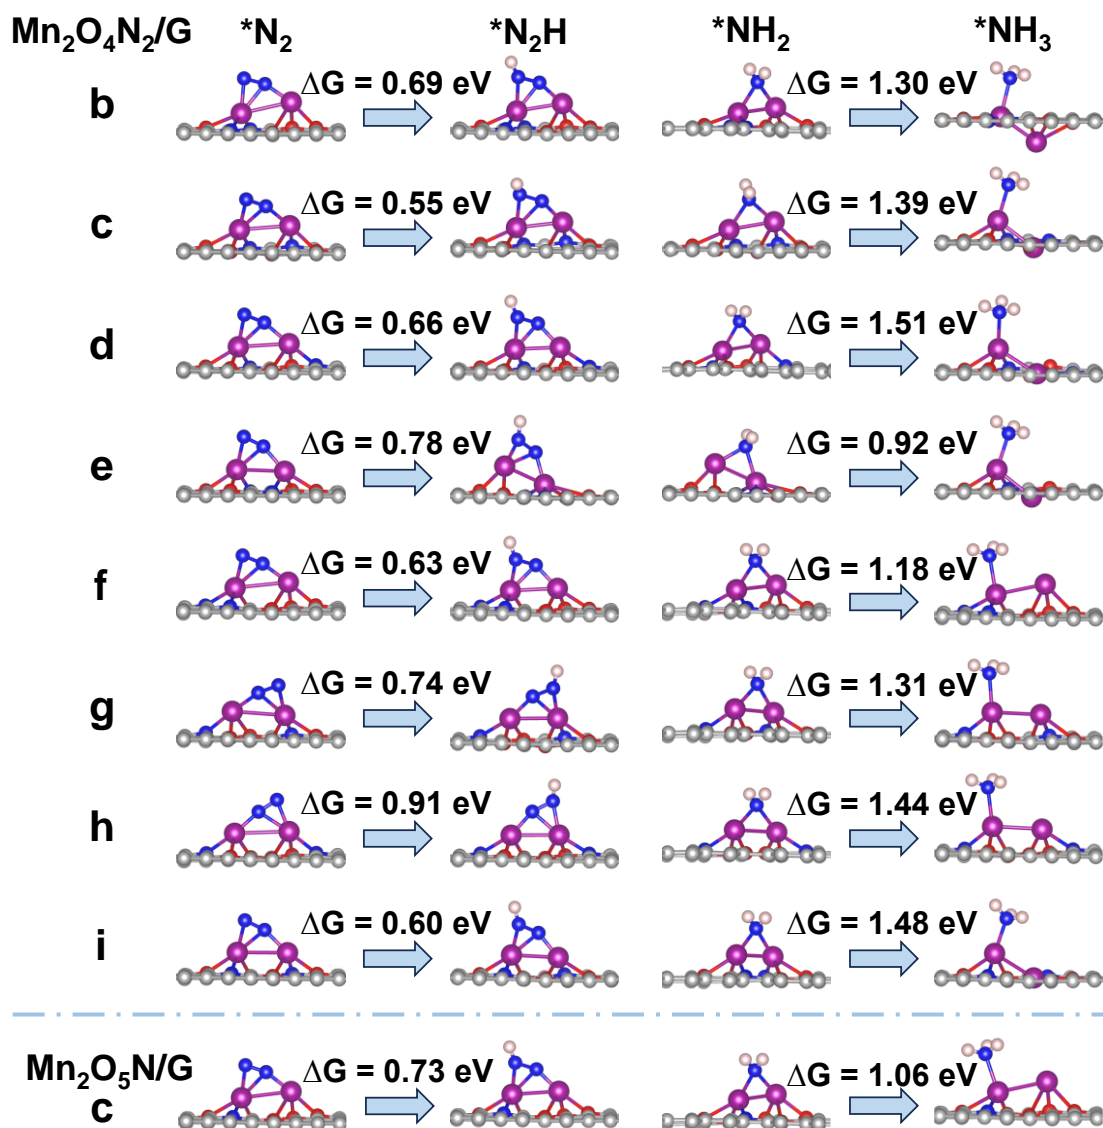

**Fig. S12.** Optimized intermediate configurations and corresponding free energy change ( $\Delta\text{G}$ ) for the first hydrogenation step ( $^*\text{N}_2 + \text{H}^+ + e^- \rightarrow ^*\text{N}_2\text{H}$ ) and last hydrogenation step ( $^*\text{NH}_2 + \text{H}^+ + e^- \rightarrow ^*\text{NH}_3$ ) during the NRR process on the  $\text{Mn}_2\text{O}_4\text{N}_2/\text{G}$  and  $\text{Mn}_2\text{O}_5\text{N}/\text{G}$  DACs. The larger colored balls denote TM atoms, and the small silver, blue, red, and pink balls represent C, N, O, and H atoms, respectively.

**Table S1.** The calculated zero-point energy ( $E_{ZPE}$  in eV) and the product ( $TS$  in eV) of the temperature (298.15 K) and entropy for the various intermediates during the NRR process.

| Species                           | $E_{ZPE}$ | $TS$ |
|-----------------------------------|-----------|------|
| *N-*N                             | 0.17      | 0.14 |
| *N-*NH                            | 0.47      | 0.08 |
| *NH-*NH                           | 0.79      | 0.11 |
| *NH*NH <sub>2</sub>               | 1.13      | 0.14 |
| *NH <sub>2</sub> *NH <sub>2</sub> | 1.50      | 0.15 |
| *NH <sub>2</sub> *NH <sub>3</sub> | 1.68      | 0.25 |
| * NH <sub>2</sub>                 | 0.66      | 0.09 |
| *N-N                              | 0.22      | 0.16 |
| *N-NH                             | 0.47      | 0.10 |
| *N-NH <sub>2</sub>                | 0.85      | 0.13 |
| *N-NH <sub>3</sub>                | 1.03      | 0.12 |
| *N                                | 0.10      | 0.03 |
| *NH                               | 0.37      | 0.05 |

**Table S2.** The zero-point energy ( $E_{\text{ZPE}}$  in eV) and the product ( $TS$  in eV) of the temperature (298.15 K) and entropy for the free  $\text{H}_2$ ,  $\text{N}_2$ , and  $\text{NH}_3$  molecules.

| Species       | $E_{\text{ZPE}}$ | $TS$ |
|---------------|------------------|------|
| $\text{H}_2$  | 0.27             | 0.41 |
| $\text{N}_2$  | 0.15             | 0.58 |
| $\text{NH}_3$ | 0.89             | 0.60 |



**Table S3.** Key parameters of the studied  $M_2N_6/G$  and  $M_2BN_5/G$  DACs, including the bond length between two TM atoms ( $d_{M_1-M_2}$ , in Å); spin magnetic moment of the TM atom bonded with B atom ( $M_1$ , in  $\mu_B$ ) and another TM atom ( $M_2$ , in  $\mu_B$ ); the net charge of the TM atom bonded with B atom ( $Q_1$ , in  $e$ ) and another TM atom ( $Q_2$ , in  $e$ ), where the positive value means the electrons transfer from the metals to the supports; and the  $d$ -band center of the TM atom bonded with the B atom ( $\varepsilon_{d1}$ , in eV) and another TM atom ( $\varepsilon_{d2}$ , in eV).

| Systems                                         | $d_{M_1-M_2}$ | $M_1$       | $M_2$       | $Q_1$       | $Q_2$       | $\varepsilon_{d1}$ | $\varepsilon_{d2}$ |
|-------------------------------------------------|---------------|-------------|-------------|-------------|-------------|--------------------|--------------------|
| <b>V<sub>2</sub>N<sub>6</sub>/G</b>             | <b>2.42</b>   | <b>3.04</b> | <b>3.04</b> | <b>1.06</b> | <b>1.06</b> | <b>0.43</b>        | <b>0.43</b>        |
| V <sub>2</sub> BN <sub>5</sub> /G <sup>α</sup>  | 2.64          | 2.48        | 2.22        | 1.05        | 1.17        | 0.33               | 0.24               |
| V <sub>2</sub> BN <sub>5</sub> /G <sup>β</sup>  | 2.44          | 2.47        | 2.93        | 0.93        | 1.10        | 0.55               | 0.48               |
| V <sub>2</sub> BN <sub>5</sub> /G <sup>γ</sup>  | 2.69          | 2.33        | 2.94        | 0.89        | 1.14        | 0.38               | 0.53               |
| <b>Cr<sub>2</sub>N<sub>6</sub>/G</b>            | <b>2.57</b>   | <b>4.17</b> | <b>4.17</b> | <b>1.00</b> | <b>1.00</b> | <b>0.33</b>        | <b>0.33</b>        |
| Cr <sub>2</sub> BN <sub>5</sub> /G <sup>α</sup> | 2.72          | 3.72        | 3.67        | 0.98        | 1.10        | 0.24               | 0.35               |
| Cr <sub>2</sub> BN <sub>5</sub> /G <sup>β</sup> | 2.55          | 3.66        | 3.90        | 0.76        | 1.10        | 0.66               | 0.04               |
| Cr <sub>2</sub> BN <sub>5</sub> /G <sup>γ</sup> | 2.83          | 3.52        | 3.80        | 0.79        | 1.15        | 0.39               | -0.09              |
| <b>Mn<sub>2</sub>N<sub>6</sub>/G</b>            | <b>2.44</b>   | <b>3.41</b> | <b>3.59</b> | <b>0.96</b> | <b>0.98</b> | <b>-0.68</b>       | <b>-0.66</b>       |
| Mn <sub>2</sub> BN <sub>5</sub> /G <sup>α</sup> | 2.62          | 4.25        | 3.32        | 0.92        | 1.05        | -0.55              | -0.77              |
| Mn <sub>2</sub> BN <sub>5</sub> /G <sup>β</sup> | 2.45          | 3.61        | 4.14        | 0.74        | 1.04        | -0.57              | -0.74              |
| Mn <sub>2</sub> BN <sub>5</sub> /G <sup>γ</sup> | 2.62          | 3.67        | 3.68        | 0.69        | 1.03        | -0.30              | -0.69              |
| <b>Fe<sub>2</sub>N<sub>6</sub>/G</b>            | <b>2.22</b>   | <b>2.34</b> | <b>2.34</b> | <b>0.83</b> | <b>0.83</b> | <b>-0.89</b>       | <b>-0.89</b>       |
| Fe <sub>2</sub> BN <sub>5</sub> /G <sup>α</sup> | 2.42          | 3.28        | 2.24        | 0.79        | 0.86        | -1.35              | -1.07              |
| Fe <sub>2</sub> BN <sub>5</sub> /G <sup>β</sup> | 2.25          | 2.57        | 2.99        | 0.60        | 0.88        | -1.03              | -1.08              |
| Fe <sub>2</sub> BN <sub>5</sub> /G <sup>γ</sup> | 2.18          | 1.79        | 1.78        | 0.57        | 0.81        | -0.67              | -0.71              |
| <b>Co<sub>2</sub>N<sub>6</sub>/G</b>            | <b>2.25</b>   | <b>1.24</b> | <b>1.24</b> | <b>0.69</b> | <b>0.69</b> | <b>-1.14</b>       | <b>-1.14</b>       |
| Co <sub>2</sub> BN <sub>5</sub> /G <sup>α</sup> | 2.27          | 1.83        | 1.18        | 0.53        | 0.71        | -1.05              | -1.02              |
| Co <sub>2</sub> BN <sub>5</sub> /G <sup>β</sup> | 2.30          | 1.03        | 0.52        | 0.43        | 0.71        | -1.02              | -1.10              |
| Co <sub>2</sub> BN <sub>5</sub> /G <sup>γ</sup> | 2.20          | 1.42        | 1.51        | 0.44        | 0.68        | -1.03              | -1.07              |
| <b>Ni<sub>2</sub>N<sub>6</sub>/G</b>            | <b>2.37</b>   | <b>0.00</b> | <b>0.00</b> | <b>0.60</b> | <b>0.60</b> | <b>-1.01</b>       | <b>-1.01</b>       |
| Ni <sub>2</sub> BN <sub>5</sub> /G <sup>α</sup> | 2.45          | 0.61        | 0.36        | 0.46        | 0.67        | -1.08              | -1.45              |
| Ni <sub>2</sub> BN <sub>5</sub> /G <sup>β</sup> | 2.41          | 0.14        | 0.84        | 0.33        | 0.64        | -1.11              | -1.12              |
| Ni <sub>2</sub> BN <sub>5</sub> /G <sup>γ</sup> | 2.41          | 0.30        | 0.62        | 0.32        | 0.63        | -1.18              | -1.32              |
| <b>Cu<sub>2</sub>N<sub>6</sub>/G</b>            | <b>2.40</b>   | <b>0.25</b> | <b>0.25</b> | <b>0.70</b> | <b>0.70</b> | <b>-2.67</b>       | <b>-2.67</b>       |
| Cu <sub>2</sub> BN <sub>5</sub> /G <sup>α</sup> | 2.43          | 0.04        | 0.09        | 0.45        | 0.77        | -2.68              | -3.23              |
| Cu <sub>2</sub> BN <sub>5</sub> /G <sup>β</sup> | 2.37          | 0.00        | 0.00        | 0.52        | 0.64        | -3.53              | -2.42              |
| Cu <sub>2</sub> BN <sub>5</sub> /G <sup>γ</sup> | 2.43          | 0.00        | 0.00        | 0.44        | 0.71        | -3.22              | -2.98              |

**Table S4.** Key parameters of the studied  $M_2N_6/G$  and  $M_2ON_5/G$  DACs, including the bond length between two TM atoms ( $d_{M_1-M_2}$ , in Å); spin magnetic moment of the TM atom bonded with O atom ( $M_1$ , in  $\mu_B$ ) and another TM atom ( $M_2$ , in  $\mu_B$ ); the net charge of the TM atom bonded with O atom ( $Q_1$ , in  $e$ ) and another TM atom ( $Q_2$ , in  $e$ ), where the positive value means the electrons transfer from the metals to the supports; and the  $d$ -band center of the TM atom bonded with the O atom ( $\varepsilon_{d1}$ , in eV) and another TM atom ( $\varepsilon_{d2}$ , in eV).

| Systems                                         | $d_{M_1-M_2}$ | $M_1$       | $M_2$       | $Q_1$       | $Q_2$       | $\varepsilon_{d1}$ | $\varepsilon_{d2}$ |
|-------------------------------------------------|---------------|-------------|-------------|-------------|-------------|--------------------|--------------------|
| <b>V<sub>2</sub>N<sub>6</sub>/G</b>             | <b>2.42</b>   | <b>3.04</b> | <b>3.04</b> | <b>1.06</b> | <b>1.06</b> | <b>0.43</b>        | <b>0.43</b>        |
| V <sub>2</sub> ON <sub>5</sub> /G <sup>α</sup>  | 2.49          | 3.23        | 3.19        | 1.02        | 0.99        | 0.41               | 0.51               |
| V <sub>2</sub> ON <sub>5</sub> /G <sup>β</sup>  | 2.39          | 3.29        | 3.02        | 1.02        | 1.08        | 0.25               | 0.25               |
| V <sub>2</sub> ON <sub>5</sub> /G <sup>γ</sup>  | 2.42          | 3.26        | 3.10        | 1.00        | 1.05        | 0.34               | 0.31               |
| <b>Cr<sub>2</sub>N<sub>6</sub>/G</b>            | <b>2.57</b>   | <b>4.17</b> | <b>4.17</b> | <b>1.00</b> | <b>1.00</b> | <b>0.33</b>        | <b>0.33</b>        |
| Cr <sub>2</sub> ON <sub>5</sub> /G <sup>α</sup> | 2.59          | 4.23        | 4.28        | 0.98        | 0.94        | 0.11               | 0.29               |
| Cr <sub>2</sub> ON <sub>5</sub> /G <sup>β</sup> | 2.55          | 4.41        | 4.11        | 0.95        | 1.03        | 0.28               | 0.25               |
| Cr <sub>2</sub> ON <sub>5</sub> /G <sup>γ</sup> | 2.56          | 4.33        | 4.17        | 0.96        | 0.99        | 0.12               | 0.16               |
| <b>Mn<sub>2</sub>N<sub>6</sub>/G</b>            | <b>2.44</b>   | <b>3.41</b> | <b>3.59</b> | <b>0.96</b> | <b>0.98</b> | <b>-0.68</b>       | <b>-0.66</b>       |
| Mn <sub>2</sub> ON <sub>5</sub> /G <sup>α</sup> | 2.41          | 3.27        | 3.51        | 0.89        | 0.91        | -0.47              | -0.50              |
| Mn <sub>2</sub> ON <sub>5</sub> /G <sup>β</sup> | 2.35          | 3.63        | 3.16        | 0.88        | 0.96        | -0.43              | -0.48              |
| Mn <sub>2</sub> ON <sub>5</sub> /G <sup>γ</sup> | 2.38          | 3.57        | 3.25        | 0.91        | 0.93        | -0.63              | -0.62              |
| <b>Fe<sub>2</sub>N<sub>6</sub>/G</b>            | <b>2.22</b>   | <b>2.34</b> | <b>2.34</b> | <b>0.83</b> | <b>0.83</b> | <b>-0.89</b>       | <b>-0.89</b>       |
| Fe <sub>2</sub> ON <sub>5</sub> /G <sup>α</sup> | 2.18          | 2.08        | 2.23        | 0.74        | 0.74        | -0.78              | -0.72              |
| Fe <sub>2</sub> ON <sub>5</sub> /G <sup>β</sup> | 2.10          | 2.40        | 2.03        | 0.73        | 0.78        | -0.80              | -0.76              |
| Fe <sub>2</sub> ON <sub>5</sub> /G <sup>γ</sup> | 2.10          | 2.17        | 1.96        | 0.70        | 0.74        | -0.66              | -0.60              |
| <b>Co<sub>2</sub>N<sub>6</sub>/G</b>            | <b>2.25</b>   | <b>1.24</b> | <b>1.24</b> | <b>0.69</b> | <b>0.69</b> | <b>-1.14</b>       | <b>-1.14</b>       |
| Co <sub>2</sub> ON <sub>5</sub> /G <sup>α</sup> | 2.31          | 1.01        | 1.25        | 0.66        | 0.63        | -1.14              | -1.05              |
| Co <sub>2</sub> ON <sub>5</sub> /G <sup>β</sup> | 2.18          | 1.49        | 0.93        | 0.68        | 0.69        | -1.26              | -1.18              |
| Co <sub>2</sub> ON <sub>5</sub> /G <sup>γ</sup> | 2.21          | 1.25        | 0.98        | 0.63        | 0.66        | -1.17              | -1.13              |
| <b>Ni<sub>2</sub>N<sub>6</sub>/G</b>            | <b>2.37</b>   | <b>0.00</b> | <b>0.00</b> | <b>0.60</b> | <b>0.60</b> | <b>-1.01</b>       | <b>-1.01</b>       |
| Ni <sub>2</sub> ON <sub>5</sub> /G <sup>α</sup> | 2.39          | 0.00        | 0.00        | 0.60        | 0.56        | -1.34              | -1.17              |
| Ni <sub>2</sub> ON <sub>5</sub> /G <sup>β</sup> | 2.32          | 0.00        | 0.00        | 0.55        | 0.64        | -1.10              | -1.36              |
| Ni <sub>2</sub> ON <sub>5</sub> /G <sup>γ</sup> | 2.33          | 0.00        | 0.00        | 0.57        | 0.60        | -1.27              | -1.35              |
| <b>Cu<sub>2</sub>N<sub>6</sub>/G</b>            | <b>2.40</b>   | <b>0.25</b> | <b>0.25</b> | <b>0.70</b> | <b>0.70</b> | <b>-2.67</b>       | <b>-2.67</b>       |
| Cu <sub>2</sub> ON <sub>5</sub> /G <sup>α</sup> | 2.42          | 0.17        | 0.07        | 0.66        | 0.64        | -2.22              | -2.36              |
| Cu <sub>2</sub> ON <sub>5</sub> /G <sup>β</sup> | 2.34          | -0.12       | -0.18       | 0.65        | 0.69        | -2.36              | -2.46              |
| Cu <sub>2</sub> ON <sub>5</sub> /G <sup>γ</sup> | 2.35          | -0.11       | -0.11       | 0.64        | 0.65        | -2.26              | -2.34              |

**Table S5.** The calculated adsorption free energy ( $\Delta G(*N_2)$ , in eV), N-N bond length ( $d_{N-N}$ , in Å), charge transfer ( $Q$ , in  $e$ , the negative values denote the electron transfer from the DACs to  $*N_2$ ), and corresponding adsorption patterns of  $*N_2$  on  $M_2N_6/G$  and  $M_2BN_5/G$  DACs.

| Systems                       | $\Delta G(*N_2)$ | $d_{N-N}$   | $Q$          | patterns       |
|-------------------------------|------------------|-------------|--------------|----------------|
| <b><math>V_2N_6/G</math></b>  | <b>-1.52</b>     | <b>1.27</b> | <b>-0.95</b> | <b>side-on</b> |
| $V_2BN_5/G^\alpha$            | -1.42            | 1.24        | -0.90        | side-on        |
| $V_2BN_5/G^\beta$             | -1.21            | 1.24        | -0.87        | side-on        |
| $V_2BN_5/G^\gamma$            | -1.66            | 1.25        | -0.97        | side-on        |
| <b><math>Cr_2N_6/G</math></b> | <b>-0.35</b>     | <b>1.20</b> | <b>-0.71</b> | <b>side-on</b> |
| $Cr_2BN_5/G^\alpha$           | -0.40            | 1.14        | -0.39        | end-on         |
| $Cr_2BN_5/G^\beta$            | -0.22            | 1.13        | -0.26        | end-on         |
| $Cr_2BN_5/G^\gamma$           | -0.91            | 1.21        | -0.81        | side-on        |
| <b><math>Mn_2N_6/G</math></b> | <b>-0.47</b>     | <b>1.16</b> | <b>-0.51</b> | <b>end-on</b>  |
| $Mn_2BN_5/G^\alpha$           | -0.27            | 1.14        | -0.31        | end-on         |
| $Mn_2BN_5/G^\beta$            | -0.53            | 1.15        | -0.47        | end-on         |
| $Mn_2BN_5/G^\gamma$           | -0.89            | 1.20        | -0.74        | side-on        |
| <b><math>Fe_2N_6/G</math></b> | <b>-0.18</b>     | <b>1.14</b> | <b>-0.30</b> | <b>end-on</b>  |
| $Fe_2BN_5/G^\alpha$           | -0.42            | 1.14        | -0.36        | end-on         |
| $Fe_2BN_5/G^\beta$            | -0.52            | 1.14        | -0.34        | end-on         |
| $Fe_2BN_5/G^\gamma$           | -0.92            | 1.14        | -0.34        | end-on         |
| <b><math>Co_2N_6/G</math></b> | <b>-0.17</b>     | <b>1.16</b> | <b>-0.39</b> | <b>end-on</b>  |
| $Co_2BN_5/G^\alpha$           | -0.49            | 1.14        | -0.31        | end-on         |
| $Co_2BN_5/G^\beta$            | -0.14            | 1.15        | -0.36        | end-on         |
| $Co_2BN_5/G^\gamma$           | -0.80            | 1.14        | -0.32        | end-on         |
| <b><math>Ni_2N_6/G</math></b> | <b>0.40</b>      | <b>1.13</b> | <b>-0.18</b> | <b>end-on</b>  |
| $Ni_2BN_5/G^\alpha$           | -0.14            | 1.13        | -0.26        | end-on         |
| $Ni_2BN_5/G^\beta$            | 0.19             | 1.13        | -0.20        | end-on         |
| $Ni_2BN_5/G^\gamma$           | -0.40            | 1.13        | -0.22        | end-on         |
| <b><math>Cu_2N_6/G</math></b> | <b>0.41</b>      | <b>1.13</b> | <b>-0.14</b> | <b>end-on</b>  |
| $Cu_2BN_5/G^\alpha$           | 0.25             | 1.12        | -0.02        | physisorption  |
| $Cu_2BN_5/G^\beta$            | 0.25             | 1.12        | -0.02        | physisorption  |
| $Cu_2BN_5/G^\gamma$           | 0.26             | 1.12        | -0.02        | physisorption  |

**Table S6.** The calculated adsorption free energy ( $\Delta G(*N_2)$ , in eV), N-N bond length ( $d_{N-N}$ , in Å), charge transfer ( $Q$ , in  $e$ , the negative values denote the electron transfer from the DACs to  $*N_2$ ), and corresponding adsorption patterns of  $*N_2$  on  $M_2N_6/G$  and  $M_2ON_5/G$  DACs.

| Systems                       | $\Delta G(*N_2)$ | $d_{N-N}$   | $Q$          | patterns       |
|-------------------------------|------------------|-------------|--------------|----------------|
| <b><math>V_2N_6/G</math></b>  | <b>-1.52</b>     | <b>1.27</b> | <b>-0.95</b> | <b>side-on</b> |
| $V_2ON_5/G^\alpha$            | -1.90            | 1.28        | -1.04        | side-on        |
| $V_2ON_5/G^\beta$             | -1.93            | 1.28        | -0.98        | side-on        |
| $V_2ON_5/G^\gamma$            | -1.82            | 1.28        | -1.00        | side-on        |
| <b><math>Cr_2N_6/G</math></b> | <b>-0.35</b>     | <b>1.20</b> | <b>-0.71</b> | <b>side-on</b> |
| $Cr_2ON_5/G^\alpha$           | -0.70            | 1.25        | -0.99        | side-on        |
| $Cr_2ON_5/G^\beta$            | -0.27            | 1.20        | -0.72        | side-on        |
| $Cr_2ON_5/G^\gamma$           | -0.48            | 1.20        | -0.76        | side-on        |
| <b><math>Mn_2N_6/G</math></b> | <b>-0.47</b>     | <b>1.16</b> | <b>-0.51</b> | <b>end-on</b>  |
| $Mn_2ON_5/G^\alpha$           | -0.64            | 1.20        | -0.76        | side-on        |
| $Mn_2ON_5/G^\beta$            | -0.32            | 1.20        | -0.75        | side-on        |
| $Mn_2ON_5/G^\gamma$           | -0.79            | 1.21        | -0.82        | side-on        |
| <b><math>Fe_2N_6/G</math></b> | <b>-0.18</b>     | <b>1.14</b> | <b>-0.30</b> | <b>end-on</b>  |
| $Fe_2ON_5/G^\alpha$           | -0.25            | 1.15        | -0.37        | end-on         |
| $Fe_2ON_5/G^\beta$            | -0.07            | 1.14        | -0.29        | end-on         |
| $Fe_2ON_5/G^\gamma$           | 0.01             | 1.16        | -0.47        | end-on         |
| <b><math>Co_2N_6/G</math></b> | <b>-0.17</b>     | <b>1.16</b> | <b>-0.39</b> | <b>end-on</b>  |
| $Co_2ON_5/G^\alpha$           | -0.47            | 1.16        | -0.42        | end-on         |
| $Co_2ON_5/G^\beta$            | 0.02             | 1.16        | -0.40        | end-on         |
| $Co_2ON_5/G^\gamma$           | -0.29            | 1.16        | -0.41        | end-on         |
| <b><math>Ni_2N_6/G</math></b> | <b>0.40</b>      | <b>1.13</b> | <b>-0.18</b> | <b>end-on</b>  |
| $Ni_2ON_5/G^\alpha$           | 0.51             | 1.14        | -0.32        | end-on         |
| $Ni_2ON_5/G^\beta$            | 0.26             | 1.12        | -0.04        | physisorption  |
| $Ni_2ON_5/G^\gamma$           | 0.15             | 1.14        | -0.27        | end-on         |
| <b><math>Cu_2N_6/G</math></b> | <b>0.41</b>      | <b>1.13</b> | <b>-0.14</b> | <b>end-on</b>  |
| $Cu_2ON_5/G^\alpha$           | -0.24            | 1.13        | -0.21        | end-on         |
| $Cu_2ON_5/G^\beta$            | 0.27             | 1.12        | -0.02        | physisorption  |
| $Cu_2ON_5/G^\gamma$           | -0.11            | 1.13        | -0.18        | end-on         |

**Table S7.** The calculated limiting potential ( $U_L$ , in V), potential-determining step (PDS), and reaction free energy of the first hydrogenation step ( $*N_2 + H^+ + e^- \rightarrow *N_2H$ ) ( $\Delta G_1$ , in eV) and last hydrogenation step ( $*NH_2 + H^+ + e^- \rightarrow *NH_3$ ) ( $\Delta G_6$ , in eV) for NRR on  $M_2N_6/G$  and  $M_2BN_5/G$  DACs.

| Systems                       | $U_L$        | PDS                                         | $\Delta G_1$ | $\Delta G_6$ |
|-------------------------------|--------------|---------------------------------------------|--------------|--------------|
| <b><math>V_2N_6/G</math></b>  | <b>-1.01</b> | <b><math>*NH_2 \rightarrow *NH_3</math></b> | <b>-0.04</b> | <b>1.01</b>  |
| $V_2BN_5/G^\alpha$            | -0.85        | $*NH_2 \rightarrow *NH_3$                   | 0.29         | 0.85         |
| $V_2BN_5/G^\beta$             | -0.96        | $*NH_2 \rightarrow *NH_3$                   | 0.13         | 0.96         |
| $V_2BN_5/G^\gamma$            | -1.02        | $*NH_2 \rightarrow *NH_3$                   | 0.23         | 1.02         |
| <b><math>Cr_2N_6/G</math></b> | <b>-0.84</b> | <b><math>*NH_2 \rightarrow *NH_3</math></b> | <b>0.26</b>  | <b>0.84</b>  |
| $Cr_2BN_5/G^\alpha$           | -0.69        | $*NH_2 \rightarrow *NH_3$                   | 0.60         | 0.69         |
| $Cr_2BN_5/G^\beta$            | -0.70        | $*N_2 \rightarrow *N_2H$                    | 0.70         | 0.66         |
| $Cr_2BN_5/G^\gamma$           | -0.78        | $*NH_2 \rightarrow *NH_3$                   | 0.11         | 0.78         |
| <b><math>Mn_2N_6/G</math></b> | <b>-0.48</b> | <b><math>*NH_2 \rightarrow *NH_3</math></b> | <b>0.47</b>  | <b>0.48</b>  |
| $Mn_2BN_5/G^\alpha$           | -0.76        | $*N_2 \rightarrow *N_2H$                    | 0.76         | 0.18         |
| $Mn_2BN_5/G^\beta$            | -0.61        | $*N_2 \rightarrow *N_2H$                    | 0.61         | 0.57         |
| $Mn_2BN_5/G^\gamma$           | -0.80        | $*NH_2 \rightarrow *NH_3$                   | 0.62         | 0.80         |
| <b><math>Fe_2N_6/G</math></b> | <b>-0.62</b> | <b><math>*N_2 \rightarrow *N_2H</math></b>  | <b>0.62</b>  | <b>0.02</b>  |
| $Fe_2BN_5/G^\alpha$           | -0.76        | $*N_2 \rightarrow *N_2H$                    | 0.76         | 0.08         |
| $Fe_2BN_5/G^\beta$            | -0.59        | $*N_2 \rightarrow *N_2H$                    | 0.59         | 0.33         |
| $Fe_2BN_5/G^\gamma$           | -0.63        | $*N_2 \rightarrow *N_2H$                    | 0.63         | 0.63         |
| <b><math>Co_2N_6/G</math></b> | <b>-0.48</b> | <b><math>*N_2 \rightarrow *N_2H</math></b>  | <b>0.48</b>  | <b>0.43</b>  |
| $Co_2BN_5/G^\alpha$           | -0.51        | $*NH_2 \rightarrow *NH_3$                   | 0.50         | 0.51         |
| $Co_2BN_5/G^\beta$            | -0.52        | $*N_2 \rightarrow *N_2H$                    | 0.52         | 0.28         |
| $Co_2BN_5/G^\gamma$           | -0.71        | $*NH_2 \rightarrow *NH_3$                   | 0.44         | 0.71         |
| <b><math>Ni_2N_6/G</math></b> | <b>-1.36</b> | <b><math>*N_2 \rightarrow *N_2H</math></b>  | <b>1.36</b>  | <b>-0.62</b> |
| $Ni_2BN_5/G^\alpha$           | -1.26        | $*N_2 \rightarrow *N_2H$                    | 1.26         | -0.02        |
| $Ni_2BN_5/G^\beta$            | -1.07        | $*N_2 \rightarrow *N_2H$                    | 1.07         | -0.01        |
| $Ni_2BN_5/G^\gamma$           | -1.03        | $*N_2 \rightarrow *N_2H$                    | 1.03         | 0.23         |
| <b><math>Cu_2N_6/G</math></b> | <b>-1.86</b> | <b><math>*N_2 \rightarrow *N_2H</math></b>  | <b>1.86</b>  | <b>-0.91</b> |
| $Cu_2BN_5/G^\alpha$           | -1.62        | $*N_2 \rightarrow *N_2H$                    | 1.62         | -0.56        |
| $Cu_2BN_5/G^\beta$            | -2.02        | $*N_2 \rightarrow *N_2H$                    | 2.02         | -0.59        |
| $Cu_2BN_5/G^\gamma$           | -1.65        | $*N_2 \rightarrow *N_2H$                    | 1.65         | -0.21        |

**Table S8.** The calculated limiting potential ( $U_L$ , in V), potential-determining step (PDS), and reaction free energy of the first hydrogenation step ( $*N_2 + H^+ + e^- \rightarrow *N_2H$ ) ( $\Delta G_1$ , in eV) and last hydrogenation step ( $*NH_2 + H^+ + e^- \rightarrow *NH_3$ ) ( $\Delta G_6$ , in eV) for NRR on  $M_2N_6/G$  and  $M_2ON_5/G$  DACs.

| Systems                       | $U_L$        | PDS                                         | $\Delta G_1$ | $\Delta G_6$ |
|-------------------------------|--------------|---------------------------------------------|--------------|--------------|
| <b><math>V_2N_6/G</math></b>  | <b>-1.01</b> | <b><math>*NH_2 \rightarrow *NH_3</math></b> | <b>-0.04</b> | <b>1.01</b>  |
| $V_2ON_5/G^a$                 | -1.24        | $*NH_2 \rightarrow *NH_3$                   | 0.44         | 1.24         |
| $V_2ON_5/G^b$                 | -1.31        | $*NH_2 \rightarrow *NH_3$                   | 0.27         | 1.31         |
| $V_2ON_5/G^c$                 | -1.10        | $*NH_2 \rightarrow *NH_3$                   | 0.24         | 1.10         |
| <b><math>Cr_2N_6/G</math></b> | <b>-0.84</b> | <b><math>*NH_2 \rightarrow *NH_3</math></b> | <b>0.26</b>  | <b>0.84</b>  |
| $Cr_2ON_5/G^a$                | -1.25        | $*NH_2 \rightarrow *NH_3$                   | 0.22         | 1.25         |
| $Cr_2ON_5/G^b$                | -1.00        | $*NH_2 \rightarrow *NH_3$                   | 0.34         | 1.00         |
| $Cr_2ON_5/G^c$                | -0.96        | $*NH_2 \rightarrow *NH_3$                   | 0.09         | 0.96         |
| <b><math>Mn_2N_6/G</math></b> | <b>-0.48</b> | <b><math>*NH_2 \rightarrow *NH_3</math></b> | <b>0.47</b>  | <b>0.48</b>  |
| $Mn_2ON_5/G^a$                | -0.27        | $*N_2 \rightarrow *N_2H$                    | 0.27         | 0.26         |
| $Mn_2ON_5/G^b$                | -0.62        | $*N_2 \rightarrow *N_2H$                    | 0.62         | 0.30         |
| $Mn_2ON_5/G^c$                | -0.59        | $*NH_2 \rightarrow *NH_3$                   | 0.50         | 0.59         |
| <b><math>Fe_2N_6/G</math></b> | <b>-0.62</b> | <b><math>*N_2 \rightarrow *N_2H</math></b>  | <b>0.62</b>  | <b>0.02</b>  |
| $Fe_2ON_5/G^a$                | -0.46        | $*N_2 \rightarrow *N_2H$                    | 0.46         | 0.39         |
| $Fe_2ON_5/G^b$                | -0.76        | $*N_2 \rightarrow *N_2H$                    | 0.76         | 0.10         |
| $Fe_2ON_5/G^c$                | -0.52        | $*N_2 \rightarrow *N_2H$                    | 0.52         | 0.21         |
| <b><math>Co_2N_6/G</math></b> | <b>-0.48</b> | <b><math>*N_2 \rightarrow *N_2H</math></b>  | <b>0.48</b>  | <b>0.43</b>  |
| $Co_2ON_5/G^a$                | -0.69        | $*NH_2 \rightarrow *NH_3$                   | 0.58         | 0.69         |
| $Co_2ON_5/G^b$                | -0.61        | $*N_2 \rightarrow *N_2H$                    | 0.61         | 0.20         |
| $Co_2ON_5/G^c$                | -0.66        | $*N_2 \rightarrow *N_2H$                    | 0.66         | 0.37         |
| <b><math>Ni_2N_6/G</math></b> | <b>-1.36</b> | <b><math>*N_2 \rightarrow *N_2H</math></b>  | <b>1.36</b>  | <b>-0.62</b> |
| $Ni_2ON_5/G^a$                | -1.15        | $*N_2 \rightarrow *N_2H$                    | 1.15         | 0.09         |
| $Ni_2ON_5/G^b$                | -1.85        | $*N_2 \rightarrow *N_2H$                    | 1.85         | -0.46        |
| $Ni_2ON_5/G^c$                | -1.65        | $*N_2 \rightarrow *N_2H$                    | 1.65         | -0.33        |
| <b><math>Cu_2N_6/G</math></b> | <b>-1.86</b> | <b><math>*N_2 \rightarrow *N_2H</math></b>  | <b>1.86</b>  | <b>-0.91</b> |
| $Cu_2ON_5/G^a$                | -1.67        | $*N_2 \rightarrow *N_2H$                    | 1.67         | -0.25        |
| $Cu_2ON_5/G^b$                | -1.86        | $*N_2 \rightarrow *N_2H$                    | 1.86         | -0.65        |
| $Cu_2ON_5/G^c$                | -1.80        | $*N_2 \rightarrow *N_2H$                    | 1.80         | -0.05        |

**Table S9.** The calculated formation energy ( $E_f$ , in eV) of  $M_2N_6/G$ ,  $M_2B_6/G$ , and  $M_2O_6/G$  DACs.

| Metal | $M_2N_6/G$ | $M_2B_6/G$ | $M_2O_6/G$ |
|-------|------------|------------|------------|
| V     | 4.34       | 12.64      | 6.89       |
| Cr    | 4.07       | 13.22      | 5.87       |
| Mn    | 3.65       | 12.04      | 5.01       |
| Fe    | 4.03       | 12.36      | 6.39       |
| Co    | 3.85       | 11.30      | 6.68       |
| Ni    | 3.06       | 11.25      | 5.56       |
| Cu    | 3.78       | 11.65      | 5.76       |

**Table S10.** The calculated limiting potential ( $U_L$ , in V), potential-determining step (PDS), and reaction free energy of the first hydrogenation step ( $*N_2 + H^+ + e^- \rightarrow *N_2H$ ) ( $\Delta G_1$ , in eV) and last hydrogenation step ( $*NH_2 + H^+ + e^- \rightarrow *NH_3$ ) ( $\Delta G_6$ , in eV) for NRR on  $M_2N_6/G$ ,  $M_2B_6/G$ , and  $M_2O_6/G$  DACs.

| Systems                       | $U_L$        | PDS                                         | $\Delta G_1$ | $\Delta G_6$ |
|-------------------------------|--------------|---------------------------------------------|--------------|--------------|
| <b><math>V_2N_6/G</math></b>  | <b>-1.01</b> | <b><math>*NH_2 \rightarrow *NH_3</math></b> | <b>-0.04</b> | <b>1.01</b>  |
| $V_2B_6/G$                    | -0.92        | $*N_2 \rightarrow *N_2H$                    | 0.92         | -0.08        |
| $V_2O_6/G$                    | -0.75        | $*NH_2 \rightarrow *NH_3$                   | -0.09        | 0.75         |
| <b><math>Cr_2N_6/G</math></b> | <b>-0.84</b> | <b><math>*NH_2 \rightarrow *NH_3</math></b> | <b>0.26</b>  | <b>0.84</b>  |
| $Cr_2B_6/G$                   | -0.43        | $*N_2 \rightarrow *N_2H$                    | 0.43         | -0.01        |
| $Cr_2O_6/G$                   | -1.51        | $*NH_2 \rightarrow *NH_3$                   | 0.00         | 1.51         |
| <b><math>Mn_2N_6/G</math></b> | <b>-0.48</b> | <b><math>*NH_2 \rightarrow *NH_3</math></b> | <b>0.47</b>  | <b>0.48</b>  |
| $Mn_2B_6/G$                   | -0.60        | $*N_2 \rightarrow *N_2H$                    | 0.60         | -0.21        |
| $Mn_2O_6/G$                   | -1.06        | $*NH_2 \rightarrow *NH_3$                   | 0.69         | 1.06         |
| <b><math>Fe_2N_6/G</math></b> | <b>-0.62</b> | <b><math>*N_2 \rightarrow *N_2H</math></b>  | <b>0.62</b>  | <b>0.02</b>  |
| $Fe_2B_6/G$                   | -1.04        | $*N_2 \rightarrow *N_2H$                    | 1.04         | -0.52        |
| $Fe_2O_6/G$                   | -0.93        | $*NH_2 \rightarrow *NH_3$                   | 0.80         | 0.93         |
| <b><math>Co_2N_6/G</math></b> | <b>-0.48</b> | <b><math>*N_2 \rightarrow *N_2H</math></b>  | <b>0.48</b>  | <b>0.43</b>  |
| $Co_2B_6/G$                   | -1.10        | $*N_2 \rightarrow *N_2H$                    | 1.10         | -0.71        |
| $Co_2O_6/G$                   | -0.85        | $*N_2 \rightarrow *N_2H$                    | 0.85         | 0.82         |
| <b><math>Ni_2N_6/G</math></b> | <b>-1.36</b> | <b><math>*N_2 \rightarrow *N_2H</math></b>  | <b>1.36</b>  | <b>-0.62</b> |
| $Ni_2B_6/G$                   | -1.42        | $*N_2 \rightarrow *N_2H$                    | 1.42         | -0.29        |
| $Ni_2O_6/G$                   | -0.79        | $*N_2 \rightarrow *N_2H$                    | 0.79         | -0.14        |
| <b><math>Cu_2N_6/G</math></b> | <b>-1.86</b> | <b><math>*N_2 \rightarrow *N_2H</math></b>  | <b>1.86</b>  | <b>-0.91</b> |
| $Cu_2B_6/G$                   | -1.26        | $*N_2 \rightarrow *N_2H$                    | 1.26         | -0.68        |
| $Cu_2O_6/G$                   | -2.09        | $*NH_2 \rightarrow *NH_3$                   | 1.01         | 2.09         |



**Table S11.** The calculated  $E_f$  (eV) of  $\text{Mn}_2\text{O}_x\text{N}_{6-x}/\text{G}$  ( $x=0-6$ ) DACs.

| No. | $\text{Mn}_2\text{N}_6/\text{G}$ | $\text{Mn}_2\text{ON}_5/\text{G}$ | $\text{Mn}_2\text{O}_2\text{N}_4/\text{G}$ | $\text{Mn}_2\text{O}_3\text{N}_3/\text{G}$ | $\text{Mn}_2\text{O}_4\text{N}_2/\text{G}$ | $\text{Mn}_2\text{O}_5\text{N}/\text{G}$ | $\text{Mn}_2\text{O}_6/\text{G}$ |
|-----|----------------------------------|-----------------------------------|--------------------------------------------|--------------------------------------------|--------------------------------------------|------------------------------------------|----------------------------------|
| a   | 3.65                             | 3.86                              | 4.30                                       | 3.51                                       | 4.68                                       | 3.61                                     | 5.01                             |
| b   | /                                | 3.33                              | 4.45                                       | 4.56                                       | 4.43                                       | 4.38                                     | /                                |
| c   | /                                | 3.90                              | 5.05                                       | 3.89                                       | 4.86                                       | 3.96                                     | /                                |
| d   | /                                | /                                 | 4.25                                       | 4.26                                       | 5.00                                       | /                                        | /                                |
| e   | /                                | /                                 | 4.65                                       | 4.64                                       | 4.30                                       | /                                        | /                                |
| f   | /                                | /                                 | 4.12                                       | 3.82                                       | 4.66                                       | /                                        | /                                |
| g   | /                                | /                                 | 4.31                                       | 4.62                                       | 4.80                                       | /                                        | /                                |
| h   | /                                | /                                 | 3.95                                       | 4.12                                       | 5.30                                       | /                                        | /                                |
| i   | /                                | /                                 | 4.20                                       | 3.94                                       | 4.36                                       | /                                        | /                                |
| j   | /                                | /                                 | /                                          | 3.52                                       | /                                          | /                                        | /                                |

**Table S12.** The calculated  $U_L$  (V), PDS, and reaction free energy of  $\Delta G_1$  and  $\Delta G_6$  (eV) for NRR on  $\text{Mn}_2\text{O}_x\text{N}_{6-x}/\text{G}$  ( $x=0-6$ ) DACs.

| Systems                                               | $U_L$        | PDS                                    | $\Delta G_1$ | $\Delta G_6$ |
|-------------------------------------------------------|--------------|----------------------------------------|--------------|--------------|
| <b><math>\text{Mn}_2\text{N}_6/\text{G}</math></b>    | <b>-0.48</b> | <b>*NH<sub>2</sub>→*NH<sub>3</sub></b> | <b>0.47</b>  | <b>0.48</b>  |
| <b><math>\text{Mn}_2\text{ON}_5/\text{G}^a</math></b> | <b>-0.27</b> | <b>*N<sub>2</sub>→*N<sub>2</sub>H</b>  | <b>0.27</b>  | <b>0.26</b>  |
| <b><math>\text{Mn}_2\text{ON}_5/\text{G}^b</math></b> | <b>-0.62</b> | <b>*N<sub>2</sub>→*N<sub>2</sub>H</b>  | <b>0.62</b>  | <b>0.30</b>  |
| <b><math>\text{Mn}_2\text{ON}_5/\text{G}^c</math></b> | <b>-0.59</b> | <b>*NH<sub>2</sub>→*NH<sub>3</sub></b> | <b>0.50</b>  | <b>0.59</b>  |
| $\text{Mn}_2\text{O}_2\text{N}_4/\text{G}^a$          | -0.83        | *NH <sub>2</sub> →*NH <sub>3</sub>     | 0.36         | 0.83         |
| $\text{Mn}_2\text{O}_2\text{N}_4/\text{G}^b$          | -0.85        | *NH <sub>2</sub> →*NH <sub>3</sub>     | 0.39         | 0.85         |
| $\text{Mn}_2\text{O}_2\text{N}_4/\text{G}^c$          | -1.18        | *NH <sub>2</sub> →*NH <sub>3</sub>     | 0.57         | 1.18         |
| $\text{Mn}_2\text{O}_2\text{N}_4/\text{G}^d$          | -0.99        | *NH <sub>2</sub> →*NH <sub>3</sub>     | 0.25         | 0.99         |
| $\text{Mn}_2\text{O}_2\text{N}_4/\text{G}^e$          | -1.21        | *N <sub>2</sub> →*N <sub>2</sub> H     | 1.21         | 1.12         |
| $\text{Mn}_2\text{O}_2\text{N}_4/\text{G}^f$          | -0.53        | *NH <sub>2</sub> →*NH <sub>3</sub>     | 0.51         | 0.53         |
| $\text{Mn}_2\text{O}_2\text{N}_4/\text{G}^g$          | -0.87        | *N <sub>2</sub> →*N <sub>2</sub> H     | 0.87         | 0.71         |
| $\text{Mn}_2\text{O}_2\text{N}_4/\text{G}^h$          | -0.84        | *NH <sub>2</sub> →*NH <sub>3</sub>     | 0.39         | 0.84         |
| $\text{Mn}_2\text{O}_2\text{N}_4/\text{G}^i$          | -1.11        | *NH <sub>2</sub> →*NH <sub>3</sub>     | 0.17         | 1.11         |
| $\text{Mn}_2\text{O}_3\text{N}_3/\text{G}^b$          | -1.34        | *NH <sub>2</sub> →*NH <sub>3</sub>     | 0.70         | 1.34         |
| $\text{Mn}_2\text{O}_3\text{N}_3/\text{G}^c$          | -1.17        | *NH <sub>2</sub> →*NH <sub>3</sub>     | 0.60         | 1.17         |
| $\text{Mn}_2\text{O}_3\text{N}_3/\text{G}^d$          | -1.50        | *NH <sub>2</sub> →*NH <sub>3</sub>     | 0.59         | 1.50         |
| $\text{Mn}_2\text{O}_3\text{N}_3/\text{G}^e$          | -1.29        | *NH <sub>2</sub> →*NH <sub>3</sub>     | 0.77         | 1.29         |
| $\text{Mn}_2\text{O}_3\text{N}_3/\text{G}^f$          | -1.15        | *NH <sub>2</sub> →*NH <sub>3</sub>     | 0.78         | 1.15         |
| $\text{Mn}_2\text{O}_3\text{N}_3/\text{G}^g$          | -1.58        | *NH <sub>2</sub> →*NH <sub>3</sub>     | 0.79         | 1.58         |
| $\text{Mn}_2\text{O}_3\text{N}_3/\text{G}^h$          | -0.56        | *NH <sub>2</sub> →*NH <sub>3</sub>     | 0.35         | 0.56         |
| $\text{Mn}_2\text{O}_3\text{N}_3/\text{G}^i$          | -1.02        | *NH <sub>2</sub> →*NH <sub>3</sub>     | 0.55         | 1.02         |
| $\text{Mn}_2\text{O}_3\text{N}_3/\text{G}^j$          | -0.29        | *N <sub>2</sub> →*N <sub>2</sub> H     | 0.29         | 0.12         |
| $\text{Mn}_2\text{O}_4\text{N}_2/\text{G}^b$          | -1.30        | *NH <sub>2</sub> →*NH <sub>3</sub>     | 0.69         | 1.30         |
| $\text{Mn}_2\text{O}_4\text{N}_2/\text{G}^c$          | -1.39        | *NH <sub>2</sub> →*NH <sub>3</sub>     | 0.55         | 1.39         |
| $\text{Mn}_2\text{O}_4\text{N}_2/\text{G}^d$          | -1.51        | *NH <sub>2</sub> →*NH <sub>3</sub>     | 0.66         | 1.51         |
| $\text{Mn}_2\text{O}_4\text{N}_2/\text{G}^e$          | -0.92        | *NH <sub>2</sub> →*NH <sub>3</sub>     | 0.78         | 0.92         |
| $\text{Mn}_2\text{O}_4\text{N}_2/\text{G}^f$          | -1.18        | *NH <sub>2</sub> →*NH <sub>3</sub>     | 0.63         | 1.18         |
| $\text{Mn}_2\text{O}_4\text{N}_2/\text{G}^g$          | -1.31        | *NH <sub>2</sub> →*NH <sub>3</sub>     | 0.74         | 1.31         |
| $\text{Mn}_2\text{O}_4\text{N}_2/\text{G}^h$          | -1.44        | *NH <sub>2</sub> →*NH <sub>3</sub>     | 0.91         | 1.44         |
| $\text{Mn}_2\text{O}_4\text{N}_2/\text{G}^i$          | -1.48        | *NH <sub>2</sub> →*NH <sub>3</sub>     | 0.60         | 1.48         |
| $\text{Mn}_2\text{O}_5\text{N}/\text{G}^c$            | -1.06        | *NH <sub>2</sub> →*NH <sub>3</sub>     | 0.73         | 1.06         |
| $\text{Mn}_2\text{O}_6/\text{G}$                      | -1.06        | *NH <sub>2</sub> →*NH <sub>3</sub>     | 0.69         | 1.06         |
